1 **Atria: An Ultra-fast and Accurate Trimmer for Adapter and**  
2 **Quality Trimming**

3

4 Jiacheng Chuan<sup>1,2</sup>, Aiguo Zhou<sup>1,3</sup>, Lawrence Richard Hale<sup>2</sup>, Miao He<sup>4</sup>, Xiang Li<sup>1,\*</sup>

5

6 <sup>1</sup> *Canadian Food Inspection Agency, Charlottetown, PE CIA5T1, Canada*

7 <sup>2</sup> *Department of Biology, University of Prince Edward Island, Charlottetown, PE*

8 *CIA4P3, Canada*

9 <sup>3</sup> *Guangdong Laboratory for Lingnan Modern Agriculture, South China Agricultural*

10 *University, Guangzhou 510642, China*

11 <sup>4</sup> *School of Life Sciences, Sun Yat-sen University, Guangzhou, Guangdong, 510275,*

12 *China*

13

14 E-mail:

15 [jiacheng.chuan@inspection.gc.ca](mailto:jiacheng.chuan@inspection.gc.ca) (Chuan J)

16 [aiguozhou@scau.edu.cn](mailto:aiguozhou@scau.edu.cn) (Zhou A)

17 [lhale@upei.ca](mailto:lhale@upei.ca) (Hale L)

18 [lsshem@mail.sysu.edu.cn](mailto:lsshem@mail.sysu.edu.cn) (He M)

19 [sean.li@inspection.gc.ca](mailto:sean.li@inspection.gc.ca) (Li X)

20 \* Corresponding author: Xiang Li, [sean.li@inspection.gc.ca](mailto:sean.li@inspection.gc.ca)

21 **Abstract**

22 **Background:** As Next Generation Sequencing takes a dominant role in terms of output  
23 capacity and sequence length, adapters attached to the reads and low-quality bases  
24 hinder the performance of downstream analysis directly and implicitly, such as  
25 producing false-positive single nucleotide polymorphisms (SNP), and generating  
26 fragmented assemblies. A fast trimming algorithm is in demand to remove adapters  
27 precisely, especially in read tails with relatively low quality.

28 **Findings:** We present a trimming program named Atria. Atria matches the adapters in  
29 paired reads and finds possible overlapped regions with a super-fast and carefully  
30 designed byte-based matching algorithm ( $O(n)$  time with  $O(1)$  space). Atria also  
31 implements multi-threading in both sequence processing and file compression and  
32 supports single-end reads.

33 **Conclusions:** Atria performs favorably in various trimming and runtime benchmarks  
34 of both simulated and real data with other cutting-edge trimmers. We also provide an  
35 ultra-fast and lightweight byte-based matching algorithm. The algorithm can be used in  
36 a broad range of short-sequence matching applications, such as primer search and seed  
37 scanning before alignment.

38 **Availability & Implementation:** The Atria executables, source code, and benchmark  
39 scripts are available at <https://github.com/cihga39871/Atria> under the MIT license.

40

41 **Research Area:** Software and Workflows

42 **Classifications:** Bioinformatics, Software Engineering

43

## 44 **Statement of Need**

### 45 **Background**

46 Next generation sequencing (NGS) is a revolutionary new technology that produces  
47 massive, high-resolution genome sequence data to facilitate a broad range of biological  
48 applications. Illumina paired-end sequencing can read a DNA fragment from both ends  
49 and generate accurate reads for downstream bioinformatics analysis, such as assembly,  
50 resequencing, transcriptome profiling, variant calling, epigenome profiling, chromatin  
51 interaction, and chromosomal rearrangements [1, 2].

52 In paired-end library preparation, adapter sequences are the technical sequences  
53 ligated to both sides of inserts, which are the DNA fragments of interest. Then, DNA  
54 molecules with adapters are sequenced from both ends of the inserts so paired-end reads  
55 are generated. If insert sizes of paired-end reads are less than the read lengths, inserts  
56 are reversely complementary, and adapters are sequenced after reading through the  
57 inserts (**Fig. 1**). Thus, adapter contamination in the 3' end needs to be removed before  
58 downstream analysis.

59 Cleaning adapters can therefore be achieved by searching adapter sequences and/or  
60 aligning paired reads (**Fig. 1**). To date, some trimmers, such as AdapterRemoval [3],  
61 Trim Galore [4], and Trimmomatic [5], use both types of information to clean adapters.  
62 However, when the quality of sequencing reads decreases, the trimming process  
63 employing both types of information is likely to give different trimming suggestions.

64 Trimmers thus face a bottleneck when working on trimming adapters at accurate  
65 positions. Also, extremely short adapters at the low-quality 3' end are sometimes  
66 difficult to detect. Thus, trade-offs between trimming truncated adapters, and retaining  
67 inserts intact, become necessary.

68       These two issues hinder trimmers from cleaning adapter sequences and leaving  
69 DNA inserts intact. To combat this, we launch Atria, an integrated trimming program  
70 for NGS data. Atria uses a super-fast byte-based matching algorithm to detect adapters  
71 and reverse complementary regions of paired reads, and integrates carefully designed  
72 decision rules to infer true adapter positions. Thus, Atria can trim extremely short  
73 adapter sequences at accurate positions and not over-trim reads without adapters (**Fig.**  
74 **1**).

75       In addition to adapter trimming, Atria integrated a set of trimming and filtering  
76 methods, such as consensus calling for overlapped regions, quality trimming,  
77 homopolymer trimming, N trimming, hard clipping from both ends, and read  
78 complexity filtration.

79

## 80 **Implementation**

81 The adapter finding algorithms used in Atria can be categorized in the following  
82 portions: DNA encoding, matching algorithm, matching and scoring, decision rules,  
83 consensus calling, quality trimming, and IO optimization (**Fig. 2**).

84

85 *DNA encoding*

86 The DNA encoding algorithm is developed based on BioSequences, a Julia package  
87 from BioJulia [6]. The original BioSequences package encodes DNA bases A, C, G, T  
88 as four-bit codes 0001, 0010, 0100, 1000, respectively. Extended codes are also  
89 supported, such as N (1111), S (0110), and gap (0000). DNA sequences are encoded  
90 and stored in a contiguous block of Random-Access Memory (RAM) as a dense array  
91 of unsigned 64-bit integers (UInt64) (**Fig. 2A**).

92 Atria makes use of the property of dense arrays to extract sequences as unsigned  
93 integers from available memory locations. When accessing the last several indices of a  
94 sequence, the extraction is illegal because operating systems do not allow the loading  
95 of data outside of sequence boundary. To solve the issue, Atria constructs a bit-safe  
96 sequence array, which elongates the sequence boundary by appending a UInt64 to the  
97 end of the original array, and setting all bits after the end of encoded DNA to 0 (**Fig.**  
98 **2A**).

99 It is noticeable that the smallest addressable unit of memory is one byte (8 bits)  
100 while each DNA is encoded in four bits, so only the even indices of sequence can be  
101 directly extracted (defining indices start from 0) (**Fig. 2A**). The extraction from odd  
102 indices requires extra operations, which is avoidable in many scenarios of a well-  
103 designed algorithm.

104 We denote a UInt64 extracted from the memory position  $n$  of sequence  $a$  by  $a_n$ .  $a_n$   
105 is a 16-mer and represents the subsequence of  $a$  indexed from  $2n$  to  $2n+15$ , which is  
106 denoted by  $a[2n:2n+15]$  (**Fig. 2A**).

107

108 *Matching algorithm*

109 Given two sequences  $a$  and  $b$ , we plan to match the 16-base-long head of  $a$  to each  
110 index of  $b$ . However, only the even indices of  $b$  can be extracted from memory without  
111 bitwise operations, so we prepared two UInt64 of  $a$ :  $a_0$  and  $a_-$ .  $a_0$  is the 16-mer UInt64  
112 loaded from the position 0 of  $a$ , and  $a_-$  can be computed from the following bitwise  
113 operations:  $(a_0 \gg 4 | a_1 \ll 4)$ . In this way,  $a_0$  represents the subsequence of  $a$  indexed  
114 from 0 to 15 ( $a[0:15]$ ), and  $a_-$  represents  $a[1:16]$  (**Fig. 2B**).

115 In this way, the problem of matching the 16-base-long head of  $a$  to each index of  $b$   
116 is converted to the problem of matching two 16-mers,  $a_0$ , and  $a_-$ , to each addressable  
117 memory position of  $b$ . The latter requires less bitwise operations.

118 The number of mismatches  $K$  is computed in the formula:

$$119 \quad K_{a_n, b_n} = 16 - \text{count\_ones}(a_n \& b_n)$$

120 where *count\_ones* counts the number of ones in the binary representation of the UInt64.

121 Let  $k$  denote the user-defined number of mismatches allowed in the 16-mer  
122 comparison of UInt64  $a_n$  and  $b_n$  ( $k = 2$  by default). After matching  $a_0$  and  $a_-$  to each  
123 addressable memory position of  $b$ , if the minimum number of mismatches is not greater  
124 than  $k$ , the smallest index of  $b$  of the minimum mismatches is reported.

125 Therefore, the complexity of the matching algorithm is  $O(n)$  time with  $O(1)$  space,  
126 so its speed is extremely fast. One limitation is that when computing the number of  
127 mismatches of  $a_n$  and  $b_n$ , and if they have ambiguous bases in the same indices, the  
128 number of mismatches is underestimated. Another limitation is that the algorithm does  
129 not handle indels. Those limitations are compensated in the design of adapter matching,  
130 scoring, and decision rules.

131

### 132 *Matching and scoring*

133 We implement four pairs of matching to utilize properties of paired-end reads  
134 thoroughly: (1) matching adapter 1 head to read 1, (2) matching adapter 2 head to read  
135 2, (3) matching read 1 head to reverse complement of read 2 and (4) matching read 2  
136 head to reverse complement of read 1 (**Fig. 2C**). If the maximum number of bases  
137 matched of (1) and (2) is less than a user-defined cut-off (default is 9), (3) and (4) will  
138 be performed with a loosed  $k$  ( $= k_{original} + 1$ ). If the largest number of matched bases of  
139 the four matches is greater than the cut-off, and some matches do not meet the  
140 requirement, we will re-run those matches with a loosed  $k$  ( $= k_{original} + 3$ ) at the insert  
141 size indicated from the best match. If the new number of matched bases is greater than  
142 the cut-off, the old match will be discarded.

143 The scoring system measures the matching reliability of the whole 16-mer rather  
144 than each base. The Phred quality score  $Q$  of each base is converted to the probability  
145  $P$  of that the corresponding base being correct using the formula:

146 
$$P = 1 - 10^{\left(-\frac{Q}{10}\right)}$$

147 Then, the average base quality  $\bar{P}$  of 16-mer sub-sequence  $a$  at the memory position

148  $n$  is computed:

149 
$$\bar{P}_{a_n} = \frac{1}{16} \sum_{i=2n}^{2n+15} P_{a[i]}$$

150 Notably, if the read quality is too low, it would imply an invalid match. However,

151 in reality, invalid matches are filtered out by the kmer-based algorithm. To solve the

152 discordance, we limit the lower bound of  $\bar{P}$  to 0.75 manually.

153 The matching score  $S$  between  $a_n$  and  $b_m$  is defined as:

154 
$$S_{a_n, b_m} = \text{count\_ones}(a_n \& b_m) \cdot \bar{P}_{a_n} \cdot \bar{P}_{b_m}$$

155 where *count\_ones* counts the number of ones in the binary representation of the UInt64.

156 When sequence  $a$  is a user-defined adapter,  $\bar{P}_a = 1$  is used. Generally, the matching

157 score  $S$  is ranged from 0 to 16.

158

159 **Pseudocode 1: Matching and scoring**

160 `r1_pos_adpt, r1_nmatch_adpt = match(adapter1, r1, k)`

161 `r2_pos_adpt, r2_nmatch_adpt = match(adapter1, r1, k)`

162 `k_extra = max(r1_nmatch_adpt, r2_nmatch_adpt) < 9 ? 1 : 0`

163 `r1_pos_pe, r1_nmatch_pe = match(reverse_complement(r2), r1, k + k_extra)`

164 `r2_pos_pe, r2_nmatch_pe = match(reverse_complement(r1), r2, k + k_extra)`

165

166 `max_nmatch = max(r1_nmatch_adpt, r2_nmatch_adpt, r1_nmatch_pe, r2_nmatch_pe)`

167 `max_pos = corresponding position of max_nmatch`

168 `if max_nmatch > 9`



```
169     for matches with any nmatch < 9
170         redo match with loosed k = k + 3 at max_pos
171         replace old results if nmatch > 9
172
173 r1_prob_adpt = average_16mer_quality(r1, r1_pos_adpt)
174 r2_prob_adpt = average_16mer_quality(r2, r2_pos_adpt)
175 r1_prob_head = average_16mer_quality(r1, 1)
176 r2_prob_head = average_16mer_quality(r2, 1)
177 r1_prob_pe = average_16mer_quality(r1, r1_pos_pe)
178 r2_prob_pe = average_16mer_quality(r2, r2_pos_pe)
179 r*_prob_* = 0.75 if any r*_prob_* < 0.75
180
181 r1_score_adpt = r1_nmatch_adpt * r1_prob_adpt
182 r2_score_adpt = r2_nmatch_adpt * r2_prob_adpt
183 r1_score_pe = r1_nmatch_pe * r1_prob_pe * r2_prob_head
184 r2_score_pe = r2_nmatch_pe * r2_prob_pe * r1_prob_head
```

185

## 186 *Decision rules*

187 This module infers correct adapter positions from the four pairs of matching described  
188 in the previous section. It is illustrated and self-explanatory in **Fig. 2D**. First, in each  
189 read, the adapter and paired-end matches are compared. The one with the higher  
190 matching score is chosen. If both matches support the same adapter position, the  
191 matching score of the read is the sum of adapter and paired-end matching scores. Then,  
192 the matches of the two paired-end reads are compared using the same strategy. If one  
193 read finds an ideal adapter (matching score > 10 by default) while the other read is too

194 short to check or the average base accuracy of its 16-mer is less than 0.6 (Phred  $Q < 5$ ),  
195 both reads will be trimmed. If the matching score of a given read pair is less than 10  
196 (by default), the read pair will not be trimmed.

197 Other read pairs will be taken a further examination to reduce false positives, which  
198 are usually adapter matches at read tails. A read tail is defined as the last several bases  
199 (default is 12 bp) of each read. Reads are not trimmed if both statements are true: (1)  
200 In any paired read, the adapter is found at the tail, but the paired-end match is not; (2)  
201 In both paired reads, adapter and pair-end matches suggest different trimming positions.

202 Before the final trimming, one additional step is required for the accurate  
203 positioning of adapter sequences. The previous steps usually assume the read 1 and 2  
204 have the same length of insert sizes, but indel in reads usually lead to over or under trim  
205 one base. To prevent this circumstance, Atria re-positions the adapter by matching one  
206 adjacent base with the first four bp of adapter sequences. The position of the highest  
207 number of bases matched is chosen to trim. This step is ignored when the inferred insert  
208 size is greater than the read length minus three because, in this situation, the adapter  
209 sequence is too short to check.

210

## 211 **Pseudocode 2: Decision rules**

```
212 function correct_insert_size(pos1, score1, pos2, score2)
213     if pos1 == pos2
214         return pos1, score1 + score2
215     else
216         score = max(score1, score2)
```

```
217         pos = corresponding pos of max score
218         return pos, score
219
220     r1_pos, r1_score = correct_insert_size(r1_pos_adpt, r1_score_adpt, r1_pos_pe,
221     r1_score_pe)
222     r2_pos, r2_score = correct_insert_size(r2_pos_adpt, r2_score_adpt, r2_pos_pe,
223     r2_score_pe)
224     r12_pos, r12_score = correct_insert_size(r1_pos, r1_score, r2_pos, r2_score)
225
226     if r1_pos != r2_pos
227         if r1_score > 10
228             r2_prob = average_16mer_quality(r2, r1_pos)
229             @goto "trim" if r2_prob < 0.6
230         elseif r2_score > 10
231             r1_prob = average_16mer_quality(r1, r2_pos)
232             @goto "trim" if r1_prob < 0.6
233
234     function check_read_tail(read)
235         E_adpt = whether_adapter_found_at_read_tail
236         E_pe = whether_pair_end_match_found_at_read_tail
237         E = E_adpt & E_pe # both matches in read tail
238         R = rx_pos_adpt == rx_pos_pe # adapter and pair-end match at same position
239         return E, R
240
241     E1, R1 = check_read_tail(r1)
242     E2, R2 = check_read_tail(r2)
243     E = E1 | E2 # at least one read matching in read tail
244     R = R1 | R2 # at least one read matching at the same position
```

```
245 is_false_positive = E & !R
246
247 if r12_score > trim_score & !is_false_positive
248     @label "trim"
249     r1_pos_adjusted = adjacent_one_bp_check(r1, adapter1, r12_pos)
250     r2_pos_adjusted = adjacent_one_bp_check(r2, adapter2, r12_pos)
251     trim(r1, r1_pos_adjusted)
252     trim(r2, r2_pos_adjusted)
```

253

#### 254 *Consensus calling*

255 In this module, the overlapped base pairs of read 1 and 2 are corrected to the  
256 corresponding bases with higher quality scores. It has three steps, prediction,  
257 assessment, and correction.

258 In the prediction step, Atria makes a preliminary estimate of whether a read pair  
259 contains an overlapped region. If adapters are trimmed and the remaining lengths of  
260 read 1 and 2 are the same, the prediction passes. If no adapter can be trimmed, two  
261 additional matching and scoring are required. The head of the reverse complement of  
262 read 2 is matched to read 1, and the head of the reverse complement of read 1 is matched  
263 to read 2. If the two matches reach a consensus, the prediction passes. Otherwise, the  
264 prediction fails and consensus calling is skipped.

265 In the assessment step, Atria compares the whole overlapped region using a similar  
266 matching algorithm, except that ambiguous bases (N, 1111) are converted to gaps (0000)

267 before matching. If the ratio of mismatch is greater than a user-defined value (28% by  
268 default), the assessment fails, and consensus calling is skipped.

269 In the correction step, each base pair in the overlapped region is corrected to the  
270 corresponding base with the highest quality score.

271

### 272 *Quality trimming*

273 Atria implements a traditional sliding window algorithm to remove the low-quality tail.

274 The sliding window scans from the front of the read and computes the average Phred

275 quality score of the sliding window. If the average quality is less than a given threshold,

276 the read tail is removed.

277

### 278 *IO optimization*

279 Atria spends more time on reading and writing than matching and trimming, so the key

280 to reducing runtime is to optimize IO usage. Considering that a large amount of RAM

281 is easily accessible nowadays, Atria trades increased RAM usage with decreased time.

282 A large block of memory is allocated for reading input files, which is then wrapped and

283 encoded to FASTQ objects parallelly using multi-threading. On the contrary, in the

284 writing process, Atria unboxes and decodes FASTQ objects to string vectors in parallel

285 and writes sequentially to files. In addition, pigz (parallel gzip) and pbzip2 (parallel

286 bzip2) are called for compression and decompression when needed [7, 8]. Atria also

287 support running with a single thread.

288

## 289 **Comparison to related work**

### 290 **The performance of adapter trimming on a simulated dataset**

291 We simulated 8.9 G bases with 100 bp paired-end reads from the *Arabidopsis thaliana*  
292 reference genome using the Skewer modified ART, a public NGS read simulator to  
293 allow adapters in the reads [9, 10]. The simulation profile was trained from a 101 bp  
294 paired-end public dataset SRR330569, and the 33 bp adapter pair used in read  
295 simulation is AGATCGGAAGAGCACACGTCTGAACTCCAGTCA and  
296 AGATCGGAAGAGCGTCGTGTAGGGAAAGAGTGT [11].

297 Atria v3.0.0 was benchmarked with cutting-edge and popular trimmers, including  
298 AdapterRemoval v2.3.1 [3], Skewer v0.2.2 [10], Fastp v0.21.0 [12], Ktrim v1.2.1 [13],  
299 Atropos v1.1.29 [14], SeqPurge v2012\_12 [15], Trim Galore v0.6.5 [4] and  
300 Trimmomatic v0.39 [5]. Only adapter trimming was used, and other trimming and  
301 filtration were disabled. Detailed command line arguments are listed in **Table S1**. Each  
302 trimming software was running on an idle Ubuntu 19.10 server with a 32-thread Intel  
303 i9-9960X Central Processing Unit (CPU) @ 3.10 GHz, 128 gigabyte (GB) DDR4-3200  
304 RAM, and a 2 terabyte (TB) Samsung 970 EVO Solid State Drive (SSD) (sequential  
305 reads and writes up to 3.5 and 2.5 TB/s).

306 The trimming performance was evaluated based on the following metrics: positive  
307 predictive value (PPV), as the fraction of the number of correctly trimmed reads to all  
308 trimmed reads; sensitivity, as the fraction of the number of correctly trimmed reads to

309 the reads with adapters; specificity, as the fraction of the number of untrimmed reads  
310 without adapters to all reads without adapters; and Matthew's correlation coefficient  
311 (MCC) measuring overall quality of pattern recognition, as

$$312 \quad MCC = \frac{TP \cdot TN - FP \cdot FN}{\sqrt{(TP + FP)(TP + FN)(TN + FN)(TN + FP)}}$$

313 where TP is the number of reads trimmed correctly, TN is the number of untrimmed  
314 reads without adapters, FP is the number of over-trimmed reads, and FN is the number  
315 of under-trimmed reads [3, 10].

316

317 **Table 1 Adapter trimming performance on the 8.9 G bases with 100 bp paired-**  
318 **end simulated data**

| Trimmer        | PPV (%) | Sensitivity (%) | Specificity (%) | MCC (%) |
|----------------|---------|-----------------|-----------------|---------|
| Atria          | 99.35   | 99.81           | 99.82           | 99.51   |
| AdapterRemoval | 99.42   | 99.94           | 99.83           | 99.61   |
| Atropos        | 99.57   | 97.34           | 99.88           | 98.00   |
| Fastp          | 98.73   | 99.58           | 99.61           | 98.92   |
| Ktrim          | 91.51   | 85.85           | 98.84           | 87.84   |
| SeqPurge       | 57.92   | 99.80           | 76.84           | 66.62   |
| Skewer         | 99.58   | 99.53           | 99.88           | 99.44   |
| Trim Galore    | 40.05   | 82.98           | 62.39           | 38.96   |
| Trimmomatic    | 99.29   | 57.86           | 99.88           | 71.05   |

319

320 The adapter trimming performance is shown in **Table 1**. AdapterRemoval, Atria  
321 and Skewer were the top-class adapter trimmers in terms of MCC (99.61%, 99.51%,  
322 99.44%, respectively) (**Table 1**). Fastp (98.92%) and Atropos (98.00%) were in the  
323 second tier (**Table 1**). Ktrim obtained a good specificity (98.84%) but sacrificed its

324 sensitivity (85.85%), and Trimmomatic achieved an exceptional specificity (99.88%)  
325 by trading off its sensitivity (57.86%) (**Table 1**).

326 To compare speed and efficiency, elapsed time (wall time) and average CPU  
327 consumption of each trimmer were recorded in different threading (1-32 threads) for  
328 uncompressed and gzip compressed data formats (**Fig. 3, Table S1**). Efficiency was  
329 defined as the fraction of processing speed to the percent of CPU utilized, so it was a  
330 better measurement, especially in CPU-intensive scenarios, such as running on a server  
331 with a job scheduling system or trimming multiple samples at the same time. Ktrim and  
332 Atria were two of the fastest trimmers in terms of speed and efficiency, from one to 16  
333 threads (**Fig. 3, Table S1**). For uncompressed data, Trimmomatic was faster than Atria  
334 using 8-32 threads, but its real CPU usage was much greater than Atria (**Fig. 3, Table**  
335 **S1**). The speed and efficiency of AdapterRemoval and Skewer were generally 2-4 times  
336 less than Atria, and Atropos was the slowest one (**Fig. 3, Table S1**). SeqPurge did not  
337 support the output of uncompressed data, so it was only tested in the compressed  
338 benchmark.

339 When trimming compressed data, the speed of AdapterRemoval, Skewer, Fastp,  
340 Atropos and Trimmomatic kept constant when the number of threads increased from 4  
341 to 32, because they failed to utilize more than four CPU in the IO process, while Atria  
342 and Trim Galore did not have the limitation (**Fig. 3, Table S1**). Atria was faster than  
343 Trim Galore, and the efficiency of Atria was constantly two to three times greater than  
344 Trim Galore (**Fig. 3, Table S1**). SeqPurge showed strange speed curves; when



345 assigning a single thread to SeqPurge, the average CPU usage was 300%, and the speed  
346 and average CPU usage dropped when assigning 8 to 32 threads (**Fig. 3, Table S1**). In  
347 addition, Ktrim did not support output compressed files, so we ignored it. In general,  
348 Atria was the fastest trimmer when trimming compressed files.

349

### 350 **The detailed statistics of adapter trimming accuracy on a simulated dataset**

351 The previous portion benchmarks on a whole dataset. This section evaluates trimming  
352 accuracy regarding different read properties, including adapter presence or absence,  
353 base error, and adapter length. To achieve the goal, Atria integrates a benchmarking  
354 toolkit for read simulation and trimming analysis.

355 The read simulation method was inspired by how sequencers read DNA. First, an  
356 original DNA fragment (insert) with a given original insert size is simulated base by  
357 base. Adenine, thymine, cytosine, and guanine are randomly chosen repetitively. Then,  
358 the insert and adapter sequences are copied base by base with an error profile, which  
359 simulates the procedure of sequencing by synthesis. The error profile defines  
360 substitution rate, insertion rate, and deletion rate.

361 Twenty-one million read pairs were simulated with a uniform read length (100 bp),  
362 different error profiles, adapter length, and original insert sizes. The baseline error  
363 profile comprises a 0.1% substitution rate, 0.001% insertion rate, and 0.001% deletion  
364 rate, inspired by an Illumina error profile analysis [16]. 1x, 2x, 3x, 4x, and 5x baseline  
365 error profile, 16, 20, 24, 28, and 33 adapter lengths, and 66 to 120 even insert sizes are

366 chosen. In this way, the reads with the least insert size have full lengths of adapters.  
367 The reads with 66-98 original insert sizes contain adapters, and the reads with 100-120  
368 original insert sizes are free from adapter contamination, except for few reads with a  
369 100 bp insert size containing indels. Therefore, in each condition combination, 30  
370 thousand read pairs were simulated to avoid random errors. The reads were trimmed  
371 with the same method described in the last section.

372 The average trimming performance among different conditions is shown in **Fig. 4**  
373 **A**. When adapters are present, Atria trims 99.9% adapters accurately, and SeqPurge,  
374 Fastp, and Atropos follow closely with an accuracy of 99.7% (**Fig. 4 A1**). When  
375 adapters are absent, AdapterRemoval, Skewer, Trimmomatic, Atropos, and Atria  
376 successfully leave 100.0% reads intact, and Fastp falls behind with 99.8% accuracy  
377 (**Fig. 4 A2**).

378 **Fig. 4 B** illustrates the trimming accuracy on different read error profiles. When  
379 adapters are present, the accuracy of all trimmers drops as error rates increase (**Fig. 4**  
380 **B1**). Atria keeps the highest accuracy from 100.0% to 99.9%, and is almost not affected  
381 by different error rates (**Fig. 4 B1**). The accuracy of SeqPurge, Fastp, and Atropos  
382 decrease from 99.9% to 99.6%, 99.5%, and 99.4%, respectively (**Fig. 4 B1**). With no  
383 adapter present in reads, the accuracy is hardly influenced by error profiles (**Fig. 4 B2**),  
384 so the performance is similar to **Fig. 4 A2**. In addition, adapter lengths ranging from 16  
385 to 33 bp are not relevant to most trimmers' accuracy, including Atria (**Fig. 4 C**).

386

387 **The performance of adapter trimming on real sequencing dataset**

388 *RNA-Seq paired-end dataset (SRR330569)*

389 SRR330569 is a real RNA-Seq dataset sequenced from *Drosophila simulans* with 5.46  
390 G bases and 2 x 101 bp read length. It contains 38 bp adapter sequences  
391 AGATCGGAAGAGCGGTTTCAGCAGGAATGCCGAGACCG and  
392 AGATCGGAAGAGCGTCGTGTAGGGAAAGAGTGTAGAT in read 1 and read 2,  
393 respectively. Adapter trimming was performed by different trimmers without other  
394 trimming or filtering methods. Then, a sliding-window based quality trimming was  
395 performed to remove low-quality tails (sliding window size = 5 and average Q score  $\geq$   
396 15). The adapter-trimmed reads and adapter-and-quality-trimmed reads were mapped  
397 to the *Drosophila simulans* genome version 2.02 from FlyBase using Hisat2 v2.2.1,  
398 respectively [17, 18]. Mapping statistics were collected using SAMTools Stat v1.10  
399 [19]. Skewer did consensus calling after adapter trimming, and no option was provided  
400 to disable it. To achieve benchmark parity, Skewer was compared to Atria with  
401 consensus calling enabled, and other trimmers were compared to Atria without  
402 consensus calling. Time trimming was recorded in accordance with a common scenario:  
403 inputs were gzip-compressed and trimmed with eight threads, and outputs were also  
404 gzip-compressed to reduce massive disk use. All tested trimmers worked in the scenario  
405 except that Ktrim could not output gzip files (**Table 2**).

406 Atria was the fastest program to process and output compressed data in terms of  
407 wall time (**Table 2**). It also achieved the highest number of reads mapped and paired,

408 and the percent of properly paired reads with or without quality trimming. Generally,  
409 higher base mapped is accompanied with higher error rate in the mapping process, so  
410 it is important to interpret the two metrics together. Atria had the lowest mapping error  
411 rate of 8.1833‰ and the forth highest base mapped (**Table 2**). The trimmers  
412 (AdapterRemoval, Fastp, and Atropos) with the highest three error rates has the highest  
413 base mapped (**Table 2**). Our program generally improved more than 5% compared to  
414 other trimmers for the data without quality trimming (**Table 2**). The mapping statistics  
415 of data without quality trimming were generally worse than with quality trimming  
416 except for Atria. Specifically, the properly paired rates of other trimmers without  
417 quality trimming were 0.5 to 4% less than with quality trimming (**Table 2**). Quality  
418 trimming also increased the number of mapped and paired reads and reduced the  
419 number of unmapped reads (**Table 2**).

420

421 **Table 2 Performance of trimmers on real data**

| Metric                                                                   | Trimming and consensus |               | Trimming only     |                      |               |                      |               |                   |               |                      |
|--------------------------------------------------------------------------|------------------------|---------------|-------------------|----------------------|---------------|----------------------|---------------|-------------------|---------------|----------------------|
|                                                                          | Atria                  | Skewer        | Atria             | AR                   | Atropos       | Fastp                | Ktrim*        | SeqPurge          | Trim Galore   | Trimmomatic          |
| <b>Low-quality dataset (SRR330569, RNA, Hisat2 mapping)</b>              |                        |               |                   |                      |               |                      |               |                   |               |                      |
| Elapsed time (min:sec)*                                                  | 2:38                   | 9:19          | <b>2:32</b>       | 11:29                | 10:08         | 9:17                 | 1:34 + GZ     | 3:53              | <u>3:39</u>   | 9:38                 |
| <b>No quality trimming</b>                                               |                        |               |                   |                      |               |                      |               |                   |               |                      |
| Reads mapped and paired                                                  | 26,126,804             | 24,694,330    | <b>25,781,268</b> | <u>24,539,060</u>    | 24,505,656    | 24,545,646           | 24,196,658    | 24,240,072        | 24,046,542    | 22,797,620           |
| Reads unmapped                                                           | 27,276,761             | 28,254,804    | <b>27,379,299</b> | 28,338,455           | 28,410,022    | <u>28,350,294</u>    | 28,747,248    | 28,591,442        | 28,647,873    | 29,649,287           |
| Properly paired reads (%)                                                | 48.3                   | 45.6          | <b>47.6</b>       | <u>45.3</u>          | 45.2          | <u>45.3</u>          | 44.5          | 44.7              | 44.2          | 38.3                 |
| Base mapped (cigar)                                                      | 2,387,212,225          | 2,354,164,041 | 2,322,436,545     | <b>2,346,791,204</b> | 2,341,355,822 | <u>2,344,847,438</u> | 2,316,915,673 | 2,304,776,514     | 2,317,321,510 | 2,237,846,534        |
| Error rate (%)                                                           | 7.3952                 | 9.5897        | <b>8.1833</b>     | 9.8902               | 9.8536        | 9.8683               | 9.7920        | 9.7904            | 9.6994        | <u>9.3106</u>        |
| <b>With quality trimming</b>                                             |                        |               |                   |                      |               |                      |               |                   |               |                      |
| Reads mapped and paired                                                  | 25,942,092             | 25,787,464    | <b>25,728,206</b> | 25,721,788           | 25,714,956    | <u>25,725,480</u>    | 25,473,670    | 25,364,392        | 25,654,498    | 24,744,754           |
| Reads unmapped                                                           | 27,245,720             | 27,364,827    | <b>27,361,655</b> | 27,369,773           | 27,373,854    | <u>27,360,527</u>    | 27,556,820    | 27,736,292        | 27,400,932    | 28,064,739           |
| Properly paired reads (%)                                                | 47.9                   | 47.6          | <b>47.5</b>       | <u>47.5</u>          | <u>47.5</u>   | <u>47.5</u>          | 46.9          | 46.8              | 47.3          | 42.3                 |
| Base mapped (cigar)                                                      | 2,317,238,536          | 2,316,981,456 | 2,302,740,463     | <b>2,304,584,269</b> | 2,304,325,743 | <u>2,304,437,244</u> | 2,292,034,762 | 2,263,465,110     | 2,297,815,439 | 2,246,076,618        |
| Error rate (%)                                                           | 7.1114                 | 7.7882        | <u>7.8902</u>     | 7.9160               | 7.9141        | 7.9149               | 7.9059        | 7.8787            | 7.8921        | <b>7.5649</b>        |
| <b>High-quality dataset (ERR4695159, cell-free DNA, Bowtie2 mapping)</b> |                        |               |                   |                      |               |                      |               |                   |               |                      |
| Elapsed time (min:sec)*                                                  | 3:08                   | 11:34         | <b>3:03</b>       | 13:48                | 13:41         | 11:29                | 1:41 + GZ     | <u>4:05</u>       | 4:34          | 11:44                |
| <b>No quality trimming</b>                                               |                        |               |                   |                      |               |                      |               |                   |               |                      |
| Reads mapped and paired                                                  | 54,367,548             | 54,287,616    | <u>54,324,964</u> | 54,319,438           | 54,299,922    | 54,322,088           | 53,087,420    | <b>54,446,104</b> | 54,218,344    | 54,128,760           |
| Reads unmapped                                                           | 1,094,145              | 1,016,244     | 1,119,103         | <u>989,335</u>       | 1,002,745     | <b>978,665</b>       | 2,317,968     | 999,099           | 1,041,005     | 1,094,752            |
| Properly paired reads (%)                                                | 96.8                   | 96.7          | <u>96.7</u>       | <u>96.7</u>          | <u>96.7</u>   | <u>96.7</u>          | 94.1          | <b>97.0</b>       | 96.4          | 88.6                 |
| Base mapped (cigar)                                                      | 7,703,820,585          | 7,700,134,673 | 7,700,298,217     | <u>7,701,482,302</u> | 7,700,749,164 | 7,699,298,008        | 7,607,799,306 | 7,512,839,360     | 7,677,087,845 | <b>7,720,352,493</b> |
| Error rate (%)                                                           | 3.3082                 | 3.8388        | 3.8724            | 3.8771               | 3.8834        | <u>3.8564</u>        | 4.3239        | <b>3.8007</b>     | 3.9173        | 6.1984               |
| <b>With quality trimming</b>                                             |                        |               |                   |                      |               |                      |               |                   |               |                      |
| Reads mapped and paired                                                  | 54,553,566             | 54,526,276    | 54,546,192        | 54,541,948           | 54,539,502    | <u>54,549,462</u>    | 53,335,674    | <b>54,608,308</b> | 54,482,002    | 54,403,982           |
| Reads unmapped                                                           | 965,447                | 984,845       | 967,917           | 970,869              | 973,217       | <b>826,424</b>       | 2,136,081     | <u>890,884</u>    | 999,918       | 914,003              |
| Properly paired reads (%)                                                | 97.0                   | 97.0          | <u>97.0</u>       | <u>97.0</u>          | <u>97.0</u>   | <u>97.0</u>          | 94.4          | <b>97.1</b>       | 96.8          | 89.0                 |
| Base mapped (cigar)                                                      | 7,653,879,312          | 7,649,380,218 | 7,646,989,362     | 7,647,893,624        | 7,648,184,196 | 7,646,574,606        | 7,556,468,882 | 7,461,588,482     | 7,625,484,706 | <b>7,668,777,971</b> |
| Error rate (%)                                                           | 2.9547                 | 3.2535        | 3.2678            | 3.2698               | 3.2792        | <u>3.2634</u>        | 3.7183        | <b>3.2117</b>     | 3.3109        | 5.5798               |

422

423

*Note:* AR = AdapterRemoval. In the trimming-only benchmark, bold and underline

424

formats indicate the first and second trimmers (including tie) in terms of each metric,

425

respectively. \*Elapsed time (wall time) is benchmarked based on trimming and output

426

gzip files with 8 threads, except that Ktrim cannot output gzip files (marked with time

427

+ GZ).

428

429

*Genome-wide human cell-free DNA dataset (ERR4695159)*

430

Generally, plasma cell-free DNA is short in length [20], and trimming is extremely

431

important in medical diagnosis. Here, we chose a human genome-wide cell-free DNA

432

dataset ERR4695159. It has 8.4 G bases with 2 x 150 bp read length with 33 bp adapter

433

sequences AGATCGGAAGAGCACACGTCTGAACTCCAGTCA in read 1 and

434

AGATCGGAAGAGCGTCGTGTAGGGAAAGAGTGT in read 2. The benchmark

435

workflow was the same as the RNA-Seq analysis, except that the clean reads were

436 mapped to the human reference genome hg38 (GRCh38.p13) using Bowtie2 v2.3.5.1  
437 [21].

438 Atria was also the fastest trimmer in the scenario (3 min 3 s) (**Table 2**). SeqPurge  
439 and Trim Galore finished the task in more than 4 minutes, while others spent more than  
440 11 minutes (**Table 2**).

441 In adapter-trimming-only statistics, SeqPurge had the highest mapped and paired  
442 reads (54,446,104) and the highest properly paired reads (97.0%) (**Table 2**). Atria  
443 followed with 54,324,964 mapped and paired reads. Atria, AdapterRemoval, Atropos,  
444 and Fastp all had 96.7% properly paired reads (**Table 2**).

445 With quality trimming, the overall performance increased, and properly paired  
446 reads were closer; SeqPurge had 97.1% properly paired reads, with Atria,  
447 AdapterRemoval, Atropos, and Fastp close behind at 97.0% (**Table 2**). Only 89.0% of  
448 reads were properly paired with Trimmomatic (**Table 2**).

449

## 450 **Discussion**

451 Atria performs favorably with other cutting-edge adapter trimmers in accuracy,  
452 robustness, speed, and efficiency. Its performance is ascribed to the byte-based  
453 matching algorithm. The design concept of the algorithm is to minimize any  
454 unnecessary CPU operations by taking advantage of the data structure of dense arrays.

455 Matrix-based algorithms, such as the Needleman-Wunsch algorithm and the Smith-  
456 Waterman algorithm, allocate and update a matrix and perform base-to-base

457 comparison [22, 23]. They report every mismatch and gap between two sequences  
458 while Atria skips this step since it is focussed on the start positions of successful  
459 matches. Despite that, the matching algorithm used in Atria is able to identify mismatch  
460 loci when needed.

461 The byte-based matching algorithm is lightweight and designed for short sequence  
462 scanning. Each DNA is encoded in four bits and stores continuously in RAM. A sub-  
463 sequence can be extracted as an unsigned integer from a given memory position. For  
464 example, a 64-bit unsigned integer (UInt) represents a 16-mer, and a 128-bit UInt  
465 represents a 32-mer. The comparison between two sub-sequences is completed within  
466 the accumulator register, a CPU unit for arithmetic or logical operation. It does not  
467 require addressing or updating a scoring matrix from RAM. When comparing a short  
468 sequence, such as an adapter, to a long sequence, such as the read, the 16-mer of the  
469 short sequence is compared to every position of the long sequence. Hence, the byte-  
470 based matching algorithm has  $O(n)$  expected time complexity and  $O(1)$  space  
471 complexity in adapter matching, where  $n$  is the length of the long sequence.

472 The algorithm also has its limitations. It only reports the number of matched bases  
473 and does not report the positions of mismatches, so it cannot be used for sequence  
474 alignment solely. Besides, the algorithm does not handle insert and deletion. However,  
475 the average indel rate of Illumina library is  $10^{-6}$  to  $10^{-5}$  [16], and the low indel rate is  
476 almost negligible in real data analysis. In addition, Atria does four pairs of matches in

477 different locations to compensate for the limitation. If one match is failed because of  
478 indel, other matches will suggest the real adapter positions.

479 In the runtime benchmark, we compared how trimmers performed using extremely  
480 high CPU cores. In general, efficiency marginally decreased as CPU usage increased  
481 due to the trimmers' parallel implementation and the inevitable cost of multi-threading,  
482 such as task scheduling and context switching. In addition, IO could be the main  
483 bottleneck for most hard disk drives and some solid-state drives. Thus, if the system IO  
484 reaches a bottleneck, an efficiency plateau would be expected sooner.

485

## 486 **Conclusions**

487 We introduce not only Atria, a cutting-edge trimming software for sequence data, but  
488 also the ultra-fast and lightweight byte-based matching algorithm. The algorithm can  
489 be used in a broad range of short-sequence matching applications, such as primer search  
490 and seed scanning before alignment. Atria is implemented in Julia, a programming  
491 language designed specifically for high performance. The source code, executables, and  
492 benchmark scripts are available on Atria's Github page [24].

493

## 494 **Availability and requirements**

495 Project name: Atria

496 Project home page: <https://github.com/cihga39871/Atria>

497 Operating system(s): Linux, OSX



498 Programming language: Julia

499 Other requirements: Julia v1.4, Pigz v2.4 or higher, Pbzv v1.1.13 or higher

500 License: MIT

501 Research Resource Identification Initiative ID: SCR\_021313

502

### 503 **Data Availability**

504 The datasets SRR330569, and ERR4695159 analyzed during the current study are  
505 available in the Sequence Read Archive from the National Center for Biotechnology  
506 Information [11, 25].

507 The Atria source codes, releases, documents, and benchmark scripts can be  
508 downloaded from Atria's Github page [24].

509

### 510 **Abbreviations**

511 CPU: Central processing unit; DNA: Deoxyribonucleic acid; GB: Gigabyte; MCC:  
512 Matthew's correlation coefficient; NGS: Next-generation sequencing; PPV: Positive  
513 predictive value; RAM: Random-access memory; RNA: Ribonucleic acid; SNP: Single  
514 nucleotide polymorphism; SSD: Solid-state drive; TB: Terabyte; UInt: Unsigned  
515 integer; UInt64: Unsigned 64-bit integer; WGS: Whole-genome sequencing.

516

### 517 **Competing interests**

518 The authors declare that they have no competing interests.

519

## 520 **Funding**

521 This study was partially funded by the Interdepartmental funding of Genomics  
522 Research and Development Initiatives (GRDI), Canada to XL.

523

## 524 **Authors' contributions**

525 JC developed Atria software, performed benchmark experiments under the supervision  
526 of XL. Both XL and LH serve as co-supervisors and participates in the design of the  
527 study. MH contributes to the optimization of the algorithm. AZ participates in  
528 benchmark validation. JC, LH, and XL drafted the manuscript. All authors read and  
529 approved the final version of the manuscript.

530

## 531 **Acknowledgments**

532 The technical assistance of Jingbai Nie is greatly acknowledged. The financial support  
533 of CFIA to JC is greatly appreciated. The advice on algorithm optimization,  
534 encouragement, and support of Drs. Christian Lacroix and Stevan Springer to JC are  
535 greatly appreciated.

536

## 537 **References**

538 1. Schluth-Bolard C, Diguet F, Chatron N, Rollat-Farnier PA, Bardel C, Afenjar  
539 A, et al. Whole genome paired-end sequencing elucidates functional and  
540 phenotypic consequences of balanced chromosomal rearrangement in patients

- 541 with developmental disorders. *J Med Genet.* 2019;56 8:526-35.  
542 doi:10.1136/jmedgenet-2018-105778.
- 543 2. Tan G, Opitz L, Schlapbach R and Rehrauer H. Long fragments achieve lower  
544 base quality in Illumina paired-end sequencing. *Sci Rep.* 2019;9 1:2856.  
545 doi:10.1038/s41598-019-39076-7.
- 546 3. Schubert M, Lindgreen S and Orlando L. AdapterRemoval v2: rapid adapter  
547 trimming, identification, and read merging. *BMC Res Notes.* 2016;9 1:88.  
548 doi:10.1186/s13104-016-1900-2.
- 549 4. Krueger F. Trim galore. A wrapper tool around Cutadapt and FastQC to  
550 consistently apply quality and adapter trimming to FastQ files. 2015;516:517.
- 551 5. Bolger AM, Lohse M and Usadel B. Trimmomatic: a flexible trimmer for  
552 Illumina sequence data. *Bioinformatics.* 2014;30 15:2114-20.  
553 doi:10.1093/bioinformatics/btu170.
- 554 6. BioJulia/BioSequences.jl: Biological sequences for the Julia language.  
555 <https://github.com/BioJulia/BioSequences.jl>. Accessed 1 Dec 2020.
- 556 7. Pigz - Parallel gzip. <https://zlib.net/pigz/>. Accessed 1 Dec 2020.
- 557 8. Parallel BZIP2 (PBZIP2). <http://compression.ca/pbzip2/>. Accessed 1 Feb 2021.
- 558 9. Huang W, Li L, Myers JR and Marth GT. ART: a next-generation sequencing  
559 read simulator. *Bioinformatics.* 2012;28 4:593-4.  
560 doi:10.1093/bioinformatics/btr708.
- 561 10. Jiang H, Lei R, Ding SW and Zhu S. Skewer: a fast and accurate adapter trimmer  
562 for next-generation sequencing paired-end reads. *BMC Bioinformatics.*  
563 2014;15 1:182. doi:10.1186/1471-2105-15-182.
- 564 11. Barrett T, Clark K, Gevorgyan R, Gorelenkov V, Gribov E, Karsch-Mizrachi I,  
565 et al. BioProject and BioSample databases at NCBI: facilitating capture and  
566 organization of metadata. *Nucleic Acids Res.* 2012;40 D1:D57-D63.
- 567 12. Chen S, Zhou Y, Chen Y and Gu J. fastp: an ultra-fast all-in-one FASTQ  
568 preprocessor. *Bioinformatics.* 2018;34 17:i884-i90.  
569 doi:10.1093/bioinformatics/bty560.
- 570 13. Sun K. Ktrim: an extra-fast and accurate adapter- and quality-trimmer for  
571 sequencing data. *Bioinformatics.* 2020;36 11:3561-2.  
572 doi:10.1093/bioinformatics/btaa171.
- 573 14. Didion JP, Martin M and Collins FS. Atropos: specific, sensitive, and speedy  
574 trimming of sequencing reads. *PeerJ.* 2017;5:e3720. doi:10.7717/peerj.3720.
- 575 15. Sturm M, Schroeder C and Bauer P. SeqPurge: highly-sensitive adapter  
576 trimming for paired-end NGS data. *BMC Bioinformatics.* 2016;17 1:208.  
577 doi:10.1186/s12859-016-1069-7.
- 578 16. Schirmer M, D'Amore R, Ijaz UZ, Hall N and Quince C. Illumina error profiles:  
579 resolving fine-scale variation in metagenomic sequencing data. *BMC*  
580 *Bioinformatics.* 2016;17 1:125. doi:10.1186/s12859-016-0976-y.

- 581 17. Thurmond J, Goodman JL, Strelets VB, Attrill H, Gramates LS, Marygold SJ,  
582 et al. FlyBase 2.0: the next generation. *Nucleic Acids Res.* 2019;47 D1:D759-  
583 D65. doi:10.1093/nar/gky1003.
- 584 18. Kim D, Paggi JM, Park C, Bennett C and Salzberg SL. Graph-based genome  
585 alignment and genotyping with HISAT2 and HISAT-genotype. *Nat Biotechnol.*  
586 2019;37 8:907-15. doi:10.1038/s41587-019-0201-4.
- 587 19. Li H, Handsaker B, Wysoker A, Fennell T, Ruan J, Homer N, et al. The  
588 Sequence Alignment/Map format and SAMtools. *Bioinformatics.* 2009;25  
589 16:2078-9. doi:10.1093/bioinformatics/btp352.
- 590 20. Sun K, Jiang P, Wong AIC, Cheng YKY, Cheng SH, Zhang H, et al. Size-tagged  
591 preferred ends in maternal plasma DNA shed light on the production  
592 mechanism and show utility in noninvasive prenatal testing. *Proceedings of the*  
593 *National Academy of Sciences.* 2018;115 22:E5106-E14.
- 594 21. Langmead B, Wilks C, Antonescu V and Charles R. Scaling read aligners to  
595 hundreds of threads on general-purpose processors. *Bioinformatics.* 2019;35  
596 3:421-32. doi:10.1093/bioinformatics/bty648.
- 597 22. Needleman SB and Wunsch CD. A general method applicable to the search for  
598 similarities in the amino acid sequence of two proteins. *J Mol Biol.* 1970;48  
599 3:443-53. doi:10.1016/0022-2836(70)90057-4.
- 600 23. Smith TF and Waterman MS. Identification of common molecular  
601 subsequences. *J Mol Biol.* 1981;147 1:195-7. doi:10.1016/0022-  
602 2836(81)90087-5.
- 603 24. [cihga39871/Atria](https://github.com/cihga39871/Atria): An ultra-fast and accurate NGS adapter and quality trimmer.  
604 <https://github.com/cihga39871/Atria>. Accessed 31 Mar 2021.
- 605 25. Sequence Read Archive from the National Center for Biotechnology  
606 Information. <https://www.ncbi.nlm.nih.gov/sra/>. Accessed 15 Jan 2021.

607

## 608 **Figure legends**

609 **Figure 1 Overview of Atria workflow**

610 **Figure 2 Adapter trimming algorithms**

611 **Figure 3 Benchmark of adapter-trimming speed for uncompressed and**  
612 **compressed files on different threading options**

613 The 8.9 G bases simulated paired-end data with a 100 bp read length was trimmed in

614 both uncompressed and compressed format using up to 32 threads. Speed is the ratio of

615 the number of bases to elapsed time (wall time). SeqPurge does not support  
616 uncompressed outputs, so it is not shown in the uncompressed benchmark. In the  
617 trimming for compressed data, the speed of AdapterRemoval, Skewer, Fastp, Atropos,  
618 and Trimmomatic kept constant when the number of threads increased from 4 to 32, so  
619 we only benchmark those trimmers using 1, 2, and 4 threads. Ktrim does not support  
620 output compressed files, so it is not shown in the compressed benchmark.

621 **Figure 4 Adapter trimming accuracy on adapter presence and absence, different**  
622 **base errors, and adapter lengths**

623 A1, B1, and C1 are statistics for reads with adapter contamination, while A2, B2, C2  
624 for reads without adapters. A1 and A2 show the accumulated rates of accurate trim, one  
625 bp over trim, one bp under trim, multiple bp over trim, and multiple bp under trim. In  
626 A1, the accuracy of Trimmomatic is 41.0%. In A2, the accuracy of SeqPurge is 78.8%,  
627 the accuracy of Trim Galore is 68.3%. B1 and B2 show the trimming accuracy on  
628 different error profiles. In B1, the accuracy of Trimmomatic drops from 41.9% to  
629 40.1%. In B2, the accuracy of SeqPurge is 78.8%, and the accuracy of Trim Galore is  
630 68.2 - 68.3%. C1 and C2 show the trimming accuracy on different adapter lengths. In  
631 C1, the accuracy of Trimmomatic is 0.0% at 16 bp adapter length, 50.7% to 51.6% at  
632 adapter lengths from 20 to 33 bp. In C2, the accuracy of SeqPurge ranges from 78.7%  
633 at 16 bp to 78.9% at 33 bp, and the accuracy of Trim Galore ranges in 68.2 - 68.3%  
634 from 16 to 33 bp.

635

636 **Supplementary material**

637 **Table S1 Trimming speed on the 8.9 G bases 100 bp paired-end simulated data**

638 Atria (consensus) does both adapter trimming and paired-end consensus call (base  
 639 correction of overlapped regions). In the trimming for uncompressed data, SeqPurge  
 640 does not support uncompressed outputs, so it is not shown in the uncompressed  
 641 benchmark. Fastp does not support 32 threads, so only 1-16 threads were tested. In the  
 642 trimming for compressed data, the speed of AdapterRemoval, Skewer, Fastp, and  
 643 Trimmomatic kept constant when the number of threads increased from 4 to 32, so we  
 644 only benchmarked those trimmers using 1, 2, and 4 threads. Atropos was too slow to  
 645 trim compressed data, and Ktrim did not support compressed outputs, so they are not  
 646 shown in the compressed benchmark.

647

648

649

650

651

652 **Table 2 Performance of trimmers on real data (larger than A4)**

| Metric                                                      | Trimming and consensus |        | Trimming only |       |         |       |        |          |             |             |
|-------------------------------------------------------------|------------------------|--------|---------------|-------|---------|-------|--------|----------|-------------|-------------|
|                                                             | Atria                  | Skewer | Atria         | AR    | Atropos | Fastp | Ktrim* | SeqPurge | Trim Galore | Trimmomatic |
| <b>Low-quality dataset (SRR330569, RNA, Hisat2 mapping)</b> |                        |        |               |       |         |       |        |          |             |             |
| Elapsed time (min:sec)*                                     | 2:38                   | 9:19   | <b>2:32</b>   | 11:29 | 10:08   | 9:17  | GZ     | 3:53     | <u>3:39</u> | 9:38        |

**No quality**

**trimming**

Reads

mapped and 26,126 24,694 **25,781** 24,559 24,505 24,545 24,196 24,240 24,046 22,797

paired ,804 ,330 **,268** ,060 ,656 ,646 ,658 ,072 ,542 ,620

Reads 27,276 28,254 **27,379** 28,338 28,410 28,350 28,747 28,591 28,647 29,649

unmapped ,761 ,804 **,299** ,455 ,022 ,294 ,248 ,442 ,873 ,287

Properly

paired reads

(%) 48.3 45.6 **47.6** 45.3 45.2 45.3 44.5 44.7 44.2 38.3

Base 2,387, 2,354, 2,322, **2,346,** 2,341, 2,344, 2,316, 2,304, 2,317, 2,237,

mapped 212,22 164,04 436,54 **791,20** 355,82 847,43 915,67 776,51 321,51 846,53

(cigar) 5 1 5 **4** 2 8 3 4 0 4

Error rate 9.8902 9.8536 9.8683 9.7920 9.7904 9.6994 9.3106

(%) 7.3952 9.5897 **8.1833**

**With quality trimming**

Reads

mapped and 25,942 25,787 **25,728** 25,721 25,714 25,725 25,473 25,364 25,654 24,744

paired ,092 ,464 **,206** ,788 ,956 ,480 ,670 ,392 ,498 ,754

Reads 27,245 27,364 **27,361** 27,369 27,373 27,360 27,556 27,736 27,400 28,064

unmapped ,720 ,827 **,655** ,773 ,854 ,527 ,820 ,292 ,932 ,739

Properly

paired reads

(%) 47.9 47.6 **47.5** **47.5** **47.5** **47.5** 46.9 46.8 47.3 42.3

Base 2,317, 2,316, 2,302, **2,304,** 2,304, 2,304, 2,292, 2,263, 2,297, 2,246,

mapped 238,53 981,45 740,46 **584,26** 325,74 437,24 034,76 465,11 815,43 076,61

(cigar) 6 6 3 **9** 3 4 2 0 9 8

Error rate 7.9160 7.9141 7.9149 7.9059 7.8787 7.8921 **7.5649**

(%) 7.1114 7.7882 7.8902

**High-quality dataset (ERR4695159, cell-free DNA, Bowtie2 mapping)**

Elapsed time

1:41 +

(min:sec)\* 3:08 11:34 **3:03** 13:48 13:41 11:29 GZ 4:05 4:34 11:44

**No quality trimming**

Reads

mapped and 54,367 54,287 54,324 54,319 54,299 54,322 53,087 **54,446** 54,218 54,128

paired ,548 ,616 ,964 ,438 ,922 ,088 ,420 **,104** ,344 ,760

Reads 1,094, 1,016, 1,119, 989,33 1,002, **978,66** 2,317, 999,09 1,041, 1,094,

unmapped 145 244 103 5 745 **5** 968 9 005 752

Properly

paired reads

(%) 96.8 96.7 96.7 96.7 96.7 96.7 94.1 **97.0** 96.4 88.6

|                              |        |        |             |               |               |               |        |               |        |               |
|------------------------------|--------|--------|-------------|---------------|---------------|---------------|--------|---------------|--------|---------------|
| Base                         | 7,703, | 7,700, | 7,700,      | <u>7,701,</u> | 7,700,        | 7,699,        | 7,607, | 7,512,        | 7,677, | <b>7,720,</b> |
| mapped                       | 820,58 | 134,67 | 298,21      | <u>482,30</u> | 749,16        | 298,00        | 799,30 | 839,36        | 087,84 | <b>352,49</b> |
| (cigar)                      | 5      | 3      | 7           | <u>2</u>      | 4             | 8             | 6      | 0             | 5      | <b>3</b>      |
| Error rate                   |        |        |             | 3.8771        | 3.8834        | <u>3.8564</u> | 4.3239 | <b>3.8007</b> | 3.9173 | 6.1984        |
| (‰)                          | 3.3082 | 3.8388 | 3.8724      |               |               |               |        |               |        |               |
| <b>With quality trimming</b> |        |        |             |               |               |               |        |               |        |               |
| Reads                        |        |        |             |               |               |               |        |               |        |               |
| mapped and                   | 54,553 | 54,526 | 54,546      | 54,541        | 54,539        | <u>54,549</u> | 53,335 | <b>54,608</b> | 54,482 | 54,403        |
| paired                       | ,566   | ,276   | ,192        | ,948          | ,502          | <u>,462</u>   | ,674   | <b>,308</b>   | ,002   | ,982          |
| Reads                        | 965,44 | 984,84 | 967,91      | 970,86        | 973,21        | <b>826,42</b> | 2,136, | <u>890,88</u> | 999,91 | 914,00        |
| unmapped                     | 7      | 5      | 7           | 9             | 7             | <b>4</b>      | 081    | <u>4</u>      | 8      | 3             |
| Properly paired reads        |        |        |             |               |               |               |        |               |        |               |
| (%)                          | 97.0   | 97.0   | <u>97.0</u> | <u>97.0</u>   | <u>97.0</u>   | <u>97.0</u>   | 94.4   | <b>97.1</b>   | 96.8   | 89.0          |
| Base                         | 7,653, | 7,649, | 7,646,      | 7,647,        | <u>7,648,</u> | 7,646,        | 7,556, | 7,461,        | 7,625, | <b>7,668,</b> |
| mapped                       | 879,31 | 380,21 | 989,36      | 893,62        | <u>184,19</u> | 574,60        | 468,88 | 588,48        | 484,70 | <b>777,97</b> |
| (cigar)                      | 2      | 8      | 2           | 4             | <u>6</u>      | 6             | 2      | 2             | 6      | <b>1</b>      |
| Error rate                   |        |        |             | 3.2698        | 3.2792        | <u>3.2634</u> | 3.7183 | <b>3.2117</b> | 3.3109 | 5.5798        |
| (‰)                          | 2.9547 | 3.2535 | 3.2678      |               |               |               |        |               |        |               |

---



Adapter  
Trimming

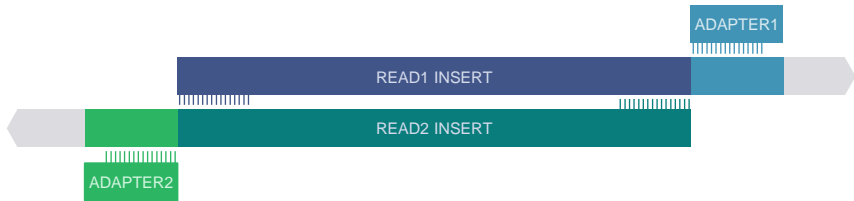

Consensus Calling of  
Overlapped Region

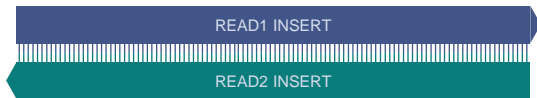

Quality  
Trimming

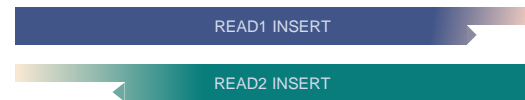

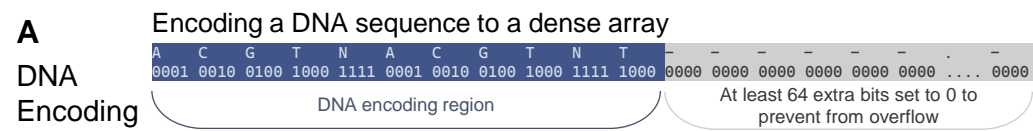

Extracting a 16-mer subsequence as a 64-bit unsigned integer (UInt64)

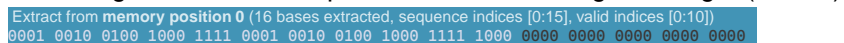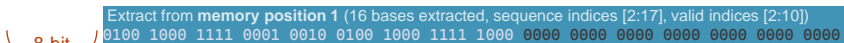

8 bits (1 byte, 2 bases) is the smallest addressable unit of memory in many computer architectures

**B** Matching Algorithm

Given two sequences a and b, matching the head of a to each memory position of b

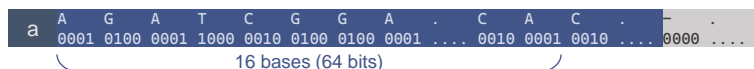

Preparing the heads of a (a0, a-)

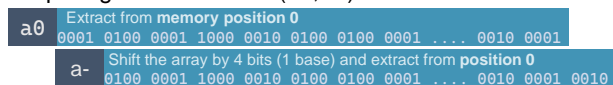

Matching (a0, a-) to each memory position of b, and the best index of b is returned

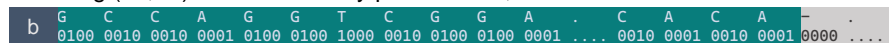

b: memory position 0, sequence indices [0:15]

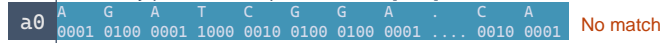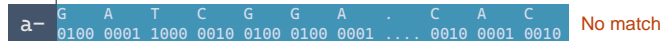

b: memory position 1, sequence indices [2:17]

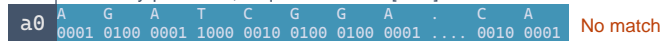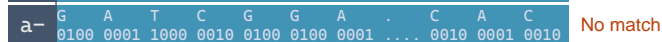

b: memory position 2, sequence indices [4:19]

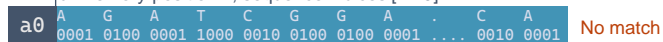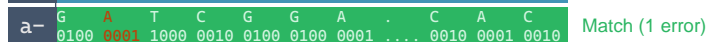

b: memory position 3, sequence indices [6:21] ... b: memory position n, sequence indices [2n:2n+15]

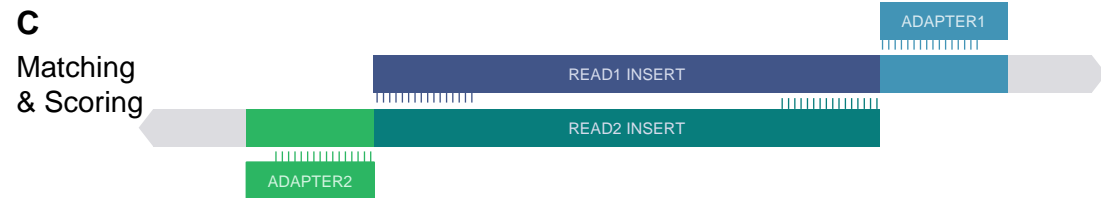

- C** Matching & Scoring (cont.)
- (1) Matching adapter 1 to read 1  
Insert size  $I_{A1}$ , matching score  $S_{A1}$
  - (2) Matching read 1 to reverse complement of read 2  
Insert size  $I_{P1}$ , matching score  $S_{P1}$
  - (3) Matching adapter 2 to read 2  
Insert size  $I_{A2}$ , matching score  $S_{A2}$
  - (4) Matching read 2 to reverse complement of read 1  
Insert size  $I_{P1}$ , matching score  $S_{P2}$

**D** Correcting insert size in each read. For  $i$  in 1, 2:

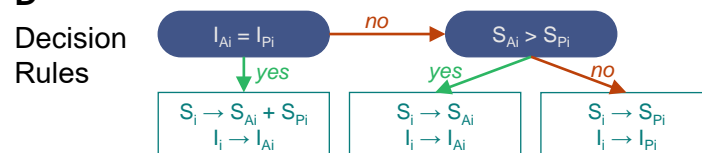

Correcting insert size from its paired read.

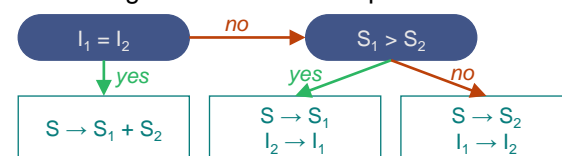

Checking false positive and trim.

$L_{1/2}$  as the valid sequence length of read 1 or 2.  
 $L_{tail}$  as the user-defined tail length.  
**E** as whether a match is found at the end of read (Bool).  
**R** as whether the adapter and insert matches suggest the same insert size (Bool).  
 $S_{trim}$  as the minimum score to trim adapters.

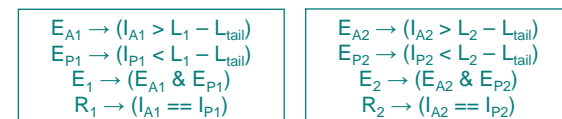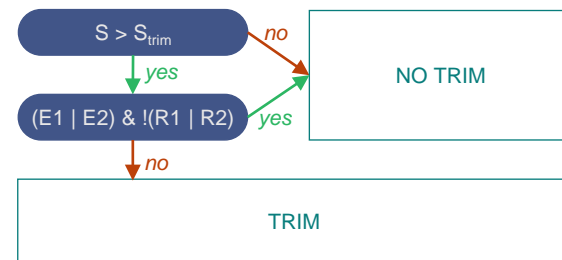

—●— Atria (consensus)  
 —●— Atria  
 —●— AdapterRemoval  
 —●— Skewer  
 —●— Trim Galore  
 —●— Trimmomatic  
—●— Ktrim  
 —●— Atropos  
 —●— Fastp  
 —●— SeqPurge

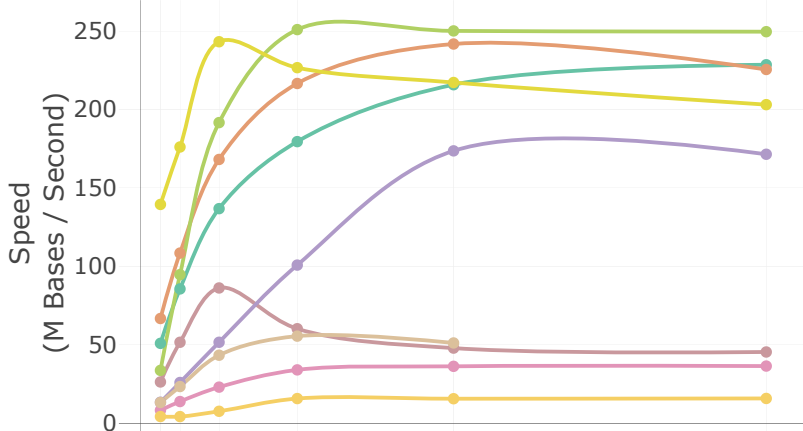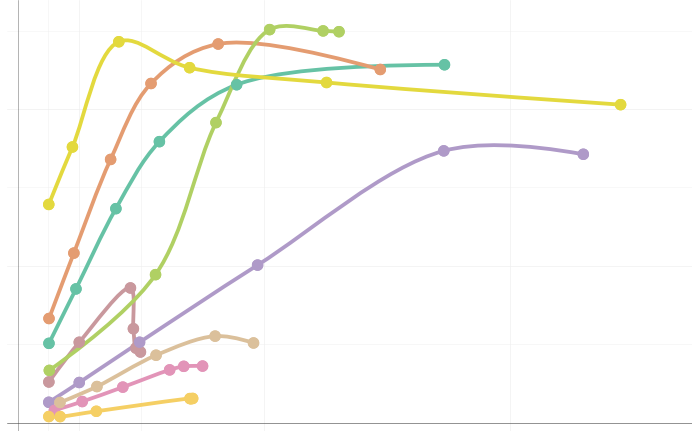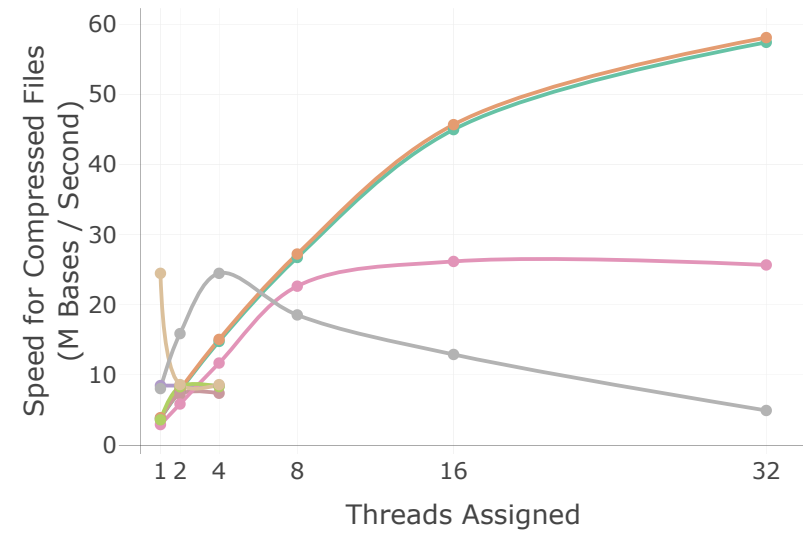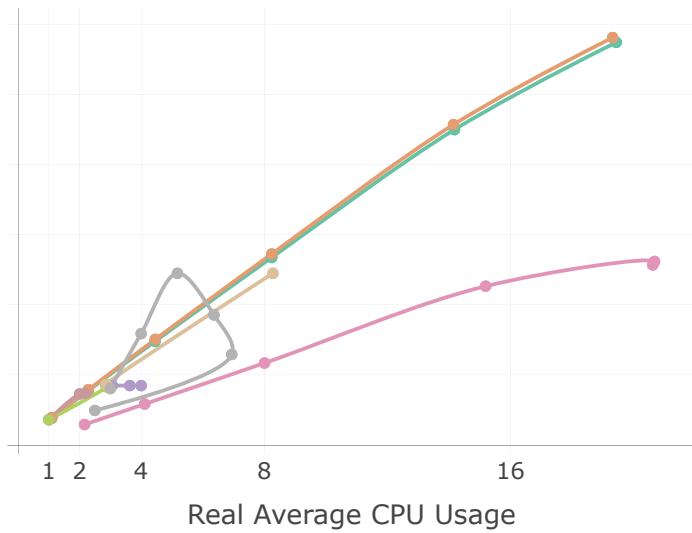

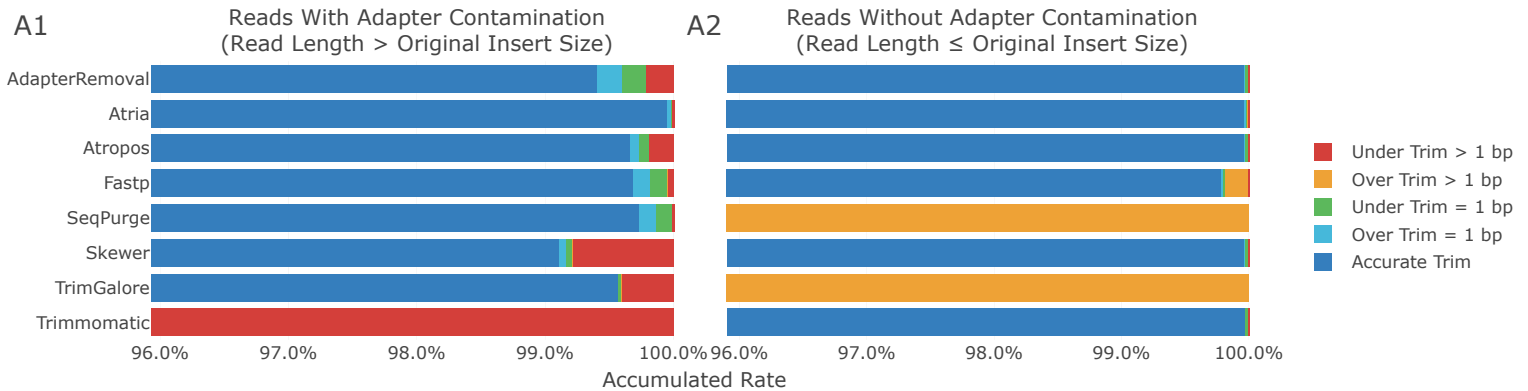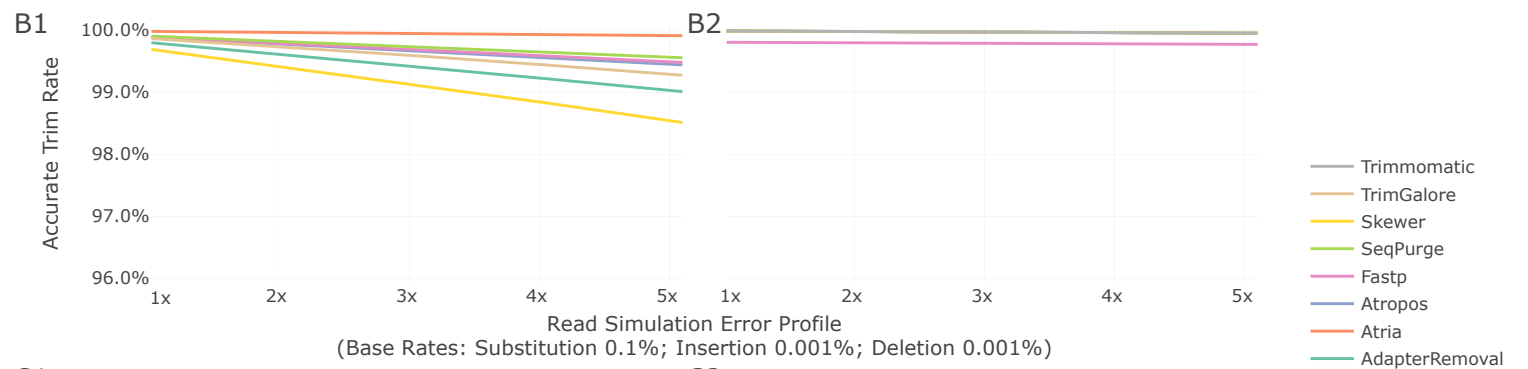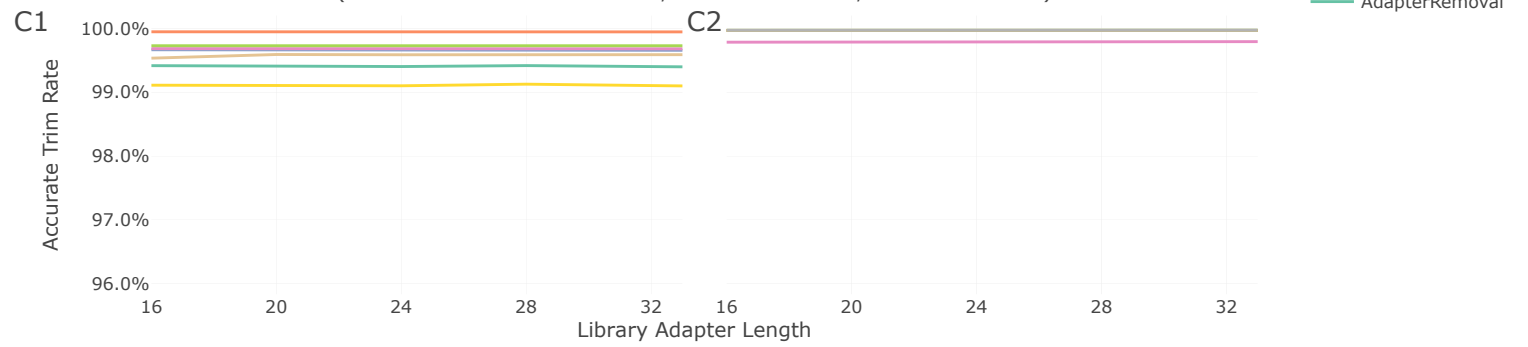

Source: https://www.biorxiv.org/content/10.1101/2021.09.07.459340v1.full.pdf
